# Supplementary material
Source: PubMed Central journal article supplement (PMC7067622)
Supplement: NIHMS1539907-supplement-2.pdf [file NIHMS1539907-supplement-2.pdf]

**Supplementary Table 1. Chemotherapy regimens given to patients**

| <b>Regimen</b>                          | <b>Patients with<br/>Thymoma</b> | <b>Patients with<br/>Thymic Carcinoma</b> |
|-----------------------------------------|----------------------------------|-------------------------------------------|
| Cisplatin, Adriamycin, cyclophosphamide | 36 (59)                          | 2 (13)                                    |
| No induction therapy                    | 8 (13)                           | 4 (27)                                    |
| Carboplatin, paclitaxel                 | 5 (8)                            | 4 (27)                                    |
| Cisplatin, etoposide                    | 6 (8)                            | 1 (7)                                     |
| Cisplatin, docetaxel                    | —                                | 2 (13)                                    |
| Other                                   | 6 (10)                           | —                                         |

Data are no. (%).

**Supplementary Table 2. Histologic subtypes (N = 72)**

| <b>Histologic Subtype</b>                   | <b>No. (%)</b> |
|---------------------------------------------|----------------|
| AB                                          | 1 (1)          |
| B1                                          | 11 (15)        |
| B2                                          | 20 (28)        |
| B2/B3                                       | 2 (3)          |
| B3                                          | 15 (21)        |
| Cortical                                    | 2 (3)          |
| Epithelial type                             | 1 (1)          |
| Lymphoepithelial-like features              | 2 (3)          |
| Squamous cell carcinoma or thymic carcinoma | 14 (19)        |
| Type 1                                      | 2 (3)          |
| Type 3                                      | 1 (1)          |
| Type A with foci of thymic carcinoma        | 1 (1)          |
